# Supplementary material for: Simultaneous degradation of tetracycline by a microbial fuel cell and its toxicity evaluation by zebrafish
Source: Royal Society of Chemistry journal article supplement (doi:10.1039/c7ra07799h), 2017-01-01
Supplement: c7ra07799h1.pdf [file c7ra07799h1.pdf]

## Supporting information

### **Simultaneous degradation of tetracycline by microbial fuel cell and its toxicity evaluation by zebrafish**

Ji Wang<sup>1,2</sup>, Ming-Fang He<sup>2</sup>, Dalu Zhang<sup>3</sup>, Ziyu Ren<sup>4</sup>, Tian-shun Song<sup>1,2\*</sup>, Jingjing Xie<sup>1,2,5\*</sup>

*<sup>1</sup>State Key Laboratory of Materials-Oriented Chemical Engineering, Nanjing Tech University, Nanjing 211816, PR China*

*<sup>2</sup>College of Biotechnology and Pharmaceutical Engineering, Nanjing Tech University, Nanjing 211816, PR China*

*<sup>3</sup>International Cooperation Division, China National Center for Biotechnology Development, Beijing, PR China*

*<sup>4</sup>Nanjing Foreign Language School, Nanjing, PR China*

*<sup>5</sup>Jiangsu National Synergetic Innovation Center for Advanced Materials (SICAM), Nanjing 211816, PR China*

\*Correspondence and requests for materials should be addressed to J.X. ([xiej@njtech.edu.cn](mailto:xiej@njtech.edu.cn)) and T.S. ([tshsong@njtech.edu.cn](mailto:tshsong@njtech.edu.cn))

Present address: 30 South Puzhu Road, College of Biotechnology and Pharmaceutical Engineering, Nanjing Tech University, Nanjing 211816, PR China. Tel.: +86 25 58139939

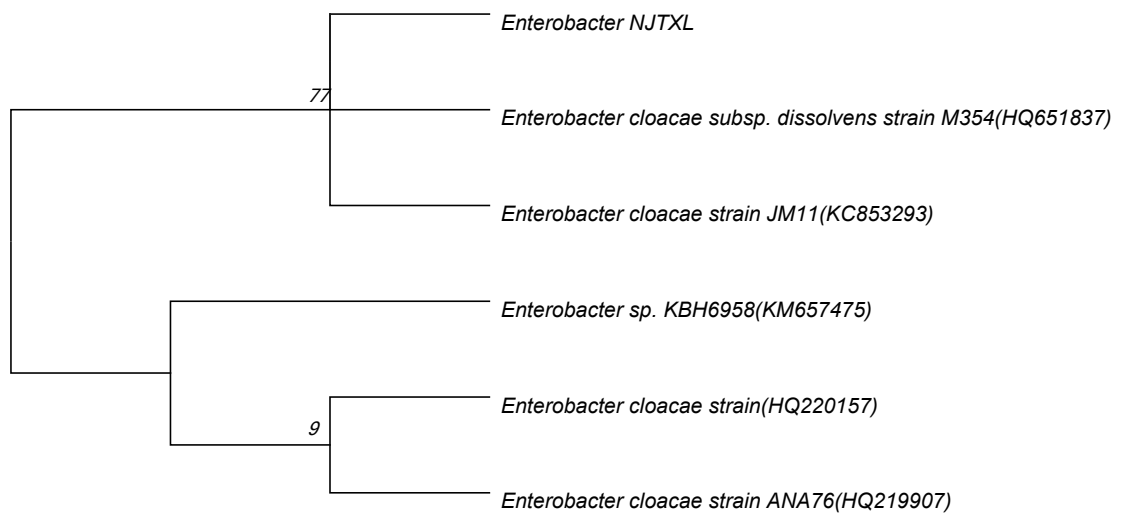

Fig S1 Phylogenetic tree of the bacterial strain NJTXL and other known *Enterobacter* strains based on 16S rRNA gene sequences constructed.
